# Supplementary material for: Investigating the Link between Alpha-1 Antitrypsin and Human Neutrophil Elastase in Bronchoalveolar Lavage Fluid of COVID-19 Patients
Source: MDPI journal article supplement (doi:10.3390/cimb44050143), 2022-05-10
Supplement: s1 [file s1]

**Table S1.** Identification of HNE and AAT by LC-MS.

| Accession            | Mass      | Score (%) | Coverage (%) | Description                            | m/z | z | Peptide         |
|----------------------|-----------|-----------|--------------|----------------------------------------|-----|---|-----------------|
| sp P01009 A1AT_HUMAN | 46.737    | 99        | 14.83%       | Alpha-1-antitrypsin<br>OS=Homo sapiens |     |   |                 |
|                      | 1345.9855 |           |              |                                        | 674 | 2 | RLGMFNIQHCK     |
|                      | 920.99274 |           |              |                                        | 922 | 1 | FLENEDR         |
|                      | 1777.9855 |           |              |                                        | 890 | 2 | TDTSHHDQDHPTFNK |
|                      | 1331.9783 |           |              |                                        | 445 | 3 | LVDKFLEDVKK     |
|                      | 1077.9855 |           |              |                                        | 540 | 2 | FLENEDRR        |
|                      | 1544.9783 |           |              |                                        | 516 | 3 | SPLFMGKVVNPTQK  |
|                      | 851.9855  |           |              |                                        | 427 | 2 | SASLHLPK        |
|                      | 1317.9855 |           |              |                                        | 660 | 2 | LGMFNIQHCKK     |
| sp P08246 ELNE_HUMAN | 28.518    | 62        | 4.87%        | Neutrophil elastase<br>OS=Homo sapiens |     |   |                 |
|                      | 1545.9855 |           |              |                                        | 774 | 2 | AVRVVLGAHNLSRR  |
|                      | 1389.9855 |           |              |                                        | 696 | 2 | AVRVVLGAHNLSR   |

**Table S2.** List of all proteins identified in gel bands analyzed by LC-MS.

| Bands | Molecular Weight | Accession                      | Mass (kDa) | Score (%) | Coverage (%) | Description                                                                                 |
|-------|------------------|--------------------------------|------------|-----------|--------------|---------------------------------------------------------------------------------------------|
| A     | 52 kDa           | tr H0YA55 H0YA55_HUMAN         | 51.461     | 99        | 38.11        | Serum albumin (Fragment) OS=Homo sapiens OX=9606 GN=ALB PE=1 SV=1                           |
|       |                  | tr F6KPG5 F6KPG5_HUMAN         | 66.531     | 99        | 37.44        | Albumin (Fragment) OS=Homo sapiens OX=9606 PE=2 SV=1                                        |
|       |                  | tr Q13747 Q13747_HUMAN         | 22.828     | 99        | 31.98        | Alpha-1 antitrypsin (Fragment) OS=Homo sapiens OX=9606 PE=2 SV=1                            |
|       |                  | sp P01009 A1AT_HUMAN           | 46.737     | 99        | 22.73        | Alpha-1-antitrypsin OS=Homo sapiens OX=9606 GN=SERPINA1 PE=1 SV=3                           |
|       |                  | sp P01011 AACT_HUMAN           | 47.651     | 99        | 24.59        | Alpha-1-antichymotrypsin OS=Homo sapiens OX=9606 GN=SERPINA3 PE=1 SV=2                      |
|       |                  | tr B4DI57 B4DI57_HUMAN         | 63.437     | 99        | 19.09        | cDNA FLJ54111, highly similar to Serotransferrin OS=Homo sapiens OX=9606 PE=2 SV=1          |
|       |                  | sp P02790 HEMO_HUMAN           | 51.676     | 99        | 8.44         | Hemopexin OS=Homo sapiens OX=9606 GN=HPX PE=1 SV=2                                          |
|       |                  | tr S6AWF0 S6AWF0_HUMAN         | 25.491     | 94        | 6.28         | IgG H chain OS=Homo sapiens OX=9606 PE=2 SV=1                                               |
| B     | 47 kDa           | tr Q5EFE5 Q5EFE5_HUMAN         | 52.363     | 92        | 6.95         | Anti-RhD monoclonal T125 gamma1 heavy chain OS=Homo sapiens OX=9606 PE=2 SV=1               |
|       |                  | tr H0YA55 H0YA55_HUMAN         | 51.461     | 99        | 35.9         | Serum albumin (Fragment) OS=Homo sapiens OX=9606 GN=ALB PE=1 SV=1                           |
|       |                  | tr F6KPG5 F6KPG5_HUMAN         | 66.531     | 99        | 33.68        | Albumin (Fragment) OS=Homo sapiens OX=9606 PE=2 SV=1                                        |
|       |                  | sp P01009 A1AT_HUMAN           | 46.737     | 99        | 12.44        | Alpha-1-antitrypsin OS=Homo sapiens OX=9606 GN=SERPINA1 PE=1 SV=3                           |
|       |                  | tr B4DHZ6 B4DHZ6_HUMAN         | 47.388     | 99        | 9.2          | Transferrin, isoform CRA_c OS=Homo sapiens OX=9606 GN=TF PE=2 SV=1                          |
|       |                  | sp P02774 VTDB_HUMAN           | 52.918     | 99        | 3.8          | Vitamin D-binding protein OS=Homo sapiens OX=9606 GN=GC PE=1 SV=2                           |
|       |                  | tr Q6PYX1 Q6PYX1_HUMAN         | 38.162     | 99        | 17.24        | Hepatitis B virus receptor binding protein (Fragment) OS=Homo sapiens OX=9606 PE=1 SV=1     |
|       |                  | sp P01011 AACT_HUMAN           | 47.651     | 99        | 5.67         | Alpha-1-antichymotrypsin OS=Homo sapiens OX=9606 GN=SERPINA3 PE=1 SV=2                      |
| C     | 42 kDa           | tr B7Z8Q4 B7Z8Q4_HUMAN         | 15.718     | 90        | 7.04         | cDNA FLJ56652, highly similar to Hemopexin OS=Homo sapiens OX=9606 PE=2 SV=1                |
|       |                  | tr B4E1V0 B4E1V0_HUMAN         | 33.025     | 89        | 2.67         | cDNA FLJ54839, highly similar to Lactotransferrin OS=Homo sapiens OX=9606 PE=2 SV=1         |
|       |                  | tr H0YA55 H0YA55_HUMAN         | 51.461     | 99        | 31.72        | Serum albumin (Fragment) OS=Homo sapiens OX=9606 GN=ALB PE=1 SV=1                           |
|       |                  | tr Q56G89 Q56G89_HUMAN         | 69.084     | 99        | 30.54        | Serum albumin OS=Homo sapiens OX=9606 PE=2 SV=1                                             |
|       |                  | sp P01009 A1AT_HUMAN           | 46.737     | 99        | 8.85         | Alpha-1-antitrypsin OS=Homo sapiens OX=9606 GN=SERPINA1 PE=1 SV=3                           |
|       |                  | tr G3V3A0 G3V3A0_HUMAN         | 23.406     | 99        | 8.29         | Alpha-1-antichymotrypsin OS=Homo sapiens OX=9606 GN=SERPINA3 PE=1 SV=1                      |
|       |                  | tr B4E1V0 B4E1V0_HUMAN         | 33.025     | 90        | 2.67         | cDNA FLJ54839, highly similar to Lactotransferrin OS=Homo sapiens OX=9606 PE=2 SV=1         |
|       |                  | tr A0A0A0MS07 A0A0A0MS07_HUMAN | 31.983     | 75        | 2.37         | Immunoglobulin heavy constant gamma 1 (Fragment) OS=Homo sapiens OX=9606 GN=IGHG1 PE=1 SV=1 |
| D     | 37 kDa           | tr H0YA55 H0YA55_HUMAN         | 51.461     | 99        | 31.5         | Serum albumin (Fragment) OS=Homo sapiens OX=9606 GN=ALB PE=1 SV=1                           |
|       |                  | tr F6KPG5 F6KPG5_HUMAN         | 66.531     | 99        | 30.09        | Albumin (Fragment) OS=Homo sapiens OX=9606 PE=2 SV=1                                        |
|       |                  | sp P01009 A1AT_HUMAN           | 46.737     | 99        | 10.77        | Alpha-1-antitrypsin OS=Homo sapiens OX=9606 GN=SERPINA1 PE=1 SV=3                           |
|       |                  | sp P01011 AACT_HUMAN           | 47.651     | 99        | 7.8          | Alpha-1-antichymotrypsin OS=Homo sapiens OX=9606 GN=SERPINA3 PE=1 SV=2                      |
|       |                  | tr Q6N095 Q6N095_HUMAN         | 52.36      | 99        | 5.89         | Uncharacterized protein OS=Homo sapiens OX=9606 GN=DKFZp686K03196 PE=1 SV=1                 |

|   |             |                                |        |    |       |                                                                                         |
|---|-------------|--------------------------------|--------|----|-------|-----------------------------------------------------------------------------------------|
| E | 25-30 kDa   | tr B4E1V0 B4E1V0_HUMAN         | 33.025 | 90 | 2.67  | cDNA FLJ54839, highly similar to Lactotransferrin OS=Homo sapiens OX=9606 PE=2 SV=1     |
|   |             | tr H0YA55 H0YA55_HUMAN         | 51.461 | 99 | 31.72 | Serum albumin (Fragment) OS=Homo sapiens OX=9606 GN=ALB PE=1 SV=1                       |
|   |             | tr Q56G89 Q56G89_HUMAN         | 69.084 | 99 | 30.54 | Serum albumin OS=Homo sapiens OX=9606 PE=2 SV=1                                         |
|   |             | sp P01857 IGHG1_HUMAN          | 36.106 | 99 | 26.36 | Immunoglobulin heavy constant gamma 1 OS=Homo sapiens OX=9606 GN=IGHG1 PE=1 SV=1        |
|   |             | tr Q6PYX1 Q6PYX1_HUMAN         | 38.162 | 99 | 25.00 | Hepatitis B virus receptor binding protein (Fragment) OS=Homo sapiens OX=9606 PE=1 SV=1 |
|   |             | sp P01009 A1AT_HUMAN           | 46.737 | 99 | 15.55 | Alpha-1-antitrypsin OS=Homo sapiens OX=9606 GN=SERPINA1 PE=1 SV=3                       |
|   |             | tr G3V3A0 G3V3A0_HUMAN         | 23.406 | 99 | 30.73 | Alpha-1-antichymotrypsin OS=Homo sapiens OX=9606 GN=SERPINA3 PE=1 SV=1                  |
|   |             | tr A0A5J6KJ24 A0A5J6KJ24_HUMAN | 38.388 | 99 | 16.52 | IGHG3 (Fragment) OS=Homo sapiens OX=9606 PE=2 SV=1                                      |
|   |             | sp P61626 LYSC_HUMAN           | 16.537 | 99 | 23.65 | Lysozyme C OS=Homo sapiens OX=9606 GN=LYZ PE=1 SV=1                                     |
|   |             | sp P01859 IGHG2_HUMAN          | 35.901 | 99 | 9.82  | Immunoglobulin heavy constant gamma 2 OS=Homo sapiens OX=9606 GN=IGHG2 PE=1 SV=2        |
|   |             | sp P01861 IGHG4_HUMAN          | 35.941 | 99 | 9.79  | Immunoglobulin heavy constant gamma 4 OS=Homo sapiens OX=9606 GN=IGHG4 PE=1 SV=1        |
|   |             | tr Q19KS2 Q19KS2_HUMAN         | 39.143 | 92 | 3.68  | Lactoferrin (Fragment) OS=Homo sapiens OX=9606 PE=2 SV=1                                |
|   |             | tr Q5H9B4 Q5H9B4_HUMAN         | 10.607 | 90 | 11.58 | Metalloproteinase inhibitor 1 (Fragment) OS=Homo sapiens OX=9606 GN=TIMP1 PE=1 SV=8     |
|   |             | sp P08246 ELNE_HUMAN           | 28.518 | 19 | 12.36 | Neutrophil elastase OS=Homo sapiens OX=9606 GN=ELANE PE=1 SV=1;                         |
|   |             | sp P61626 LYSC_HUMAN           | 16.537 | 99 | 31.76 | Lysozyme C OS=Homo sapiens OX=9606 GN=LYZ PE=1 SV=1                                     |
| F | 10 kDa      | sp P68871 HBB_HUMAN            | 15.998 | 99 | 44.9  | Hemoglobin subunit beta OS=Homo sapiens OX=9606 GN=HBB PE=1 SV=2                        |
|   |             | sp P62807 H2B1C_HUMAN          | 13.906 | 99 | 35.71 | Histone H2B type 1-C/E/F/G/I OS=Homo sapiens OX=9606 GN=H2BC4 PE=1 SV=4                 |
|   |             | tr Q56G89 Q56G89_HUMAN         | 69.084 | 99 | 6.08  | Serum albumin OS=Homo sapiens OX=9606 PE=2 SV=1                                         |
|   |             | sp P62805 H4_HUMAN             | 11.367 | 99 | 45.63 | Histone H4 OS=Homo sapiens OX=9606 GN=H4C1 PE=1 SV=2                                    |
|   |             | tr A2KBC0 A2KBC0_HUMAN         | 25.205 | 99 | 9.66  | Anti-(ED-B) scFV (Fragment) OS=Homo sapiens OX=9606 PE=2 SV=1                           |
|   |             | tr B2R5B3 B2R5B3_HUMAN         | 14.111 | 99 | 16.92 | Histone H2A OS=Homo sapiens OX=9606 PE=2 SV=1                                           |
|   |             | tr V9HW68 V9HW68_HUMAN         | 51.716 | 99 | 5.96  | Epididymis luminal protein 214 OS=Homo sapiens OX=9606 GN=HEL-214 PE=1 SV=1             |
|   |             | tr Q6GMX6 Q6GMX6_HUMAN         | 51.083 | 99 | 4.95  | IGH@ protein OS=Homo sapiens OX=9606 GN=IGH@ PE=1 SV=1                                  |
|   |             | tr A0A5C2G7S1 A0A5C2G7S1_HUMAN | 11.676 | 98 | 23.36 | IGL c60_light_IGKV3-15_IGKJ1 (Fragment) OS=Homo sapiens OX=9606 PE=2 SV=1               |
|   |             | tr A0A5C2G572 A0A5C2G572_HUMAN | 11.556 | 98 | 17.76 | IGL c3015_light_IGKV3-20_IGKJ1 (Fragment) OS=Homo sapiens OX=9606 PE=2 SV=1             |
|   |             | tr A0A5C2G8U7 A0A5C2G8U7_HUMAN | 11.714 | 98 | 17.76 | IGL c256_light_IGKV3-15_IGKJ1 (Fragment) OS=Homo sapiens OX=9606 PE=2 SV=1              |
|   |             | tr A0A5C2GIX8 A0A5C2GIX8_HUMAN | 13.391 | 94 | 8.8   | IG c75_heavy_IGHV3-23_IGHD1-26_IGHJ3 (Fragment) OS=Homo sapiens OX=9606 PE=2 SV=1       |
|   |             | tr A0A5C2G223 A0A5C2G223_HUMAN | 11.823 | 93 | 23.15 | IGL c383_light_IGKV3-20_IGKJ2 (Fragment) OS=Homo sapiens OX=9606 PE=2 SV=1              |
|   |             | sp P01011 AACT_HUMAN           | 47.651 | 90 | 3.07  | Alpha-1-antichymotrypsin OS=Homo sapiens OX=9606 GN=SERPINA3 PE=1 SV=2                  |
|   |             | tr A0A0C4DGL8 A0A0C4DGL8_HUMAN | 38.452 | 90 | 4.03  | Haptoglobin OS=Homo sapiens OX=9606 GN=HP PE=1 SV=1                                     |
|   |             | sp P08246 ELNE_HUMAN           | 28.518 | 22 | 9.36  | Neutrophil elastase OS=Homo sapiens OX=9606 GN=ELANE PE=1 SV=1;                         |
| G | 150-250 kDa | tr H0YA55 H0YA55_HUMAN         | 51.461 | 99 | 36.78 | Serum albumin (Fragment) OS=Homo sapiens OX=9606 GN=ALB PE=1 SV=1                       |

|                                |         |    |       |                                                                                            |
|--------------------------------|---------|----|-------|--------------------------------------------------------------------------------------------|
| tr C9JKR2 C9JKR2_HUMAN         | 47.287  | 99 | 35.01 | Albumin, isoform CRA_k OS=Homo sapiens OX=9606 GN=ALB PE=1 SV=1                            |
| tr B7WNR0 B7WNR0_HUMAN         | 56.212  | 99 | 34.41 | Serum albumin OS=Homo sapiens OX=9606 GN=ALB PE=1 SV=1                                     |
| tr F6KPG5 F6KPG5_HUMAN         | 66.531  | 99 | 34.36 | Albumin (Fragment) OS=Homo sapiens OX=9606 PE=2 SV=1                                       |
| sp P01857 IGHG1_HUMAN          | 36.106  | 99 | 28.79 | Immunoglobulin heavy constant gamma 1 OS=Homo sapiens OX=9606 GN=IGHG1 PE=1 SV=1           |
| tr B4DHz6 B4DHz6_HUMAN         | 47.388  | 99 | 28.77 | Transferrin, isoform CRA_c OS=Homo sapiens OX=9606 GN=TF PE=2 SV=1                         |
| tr Q6PYX1 Q6PYX1_HUMAN         | 38.162  | 99 | 26.72 | Hepatitis B virus receptor binding protein (Fragment) OS=Homo sapiens OX=9606 PE=1 SV=1    |
| tr B4DI57 B4DI57_HUMAN         | 63.437  | 99 | 24.69 | cDNA FLJ54111, highly similar to Serotransferrin OS=Homo sapiens OX=9606 PE=2 SV=1         |
| tr B4E1B2 B4E1B2_HUMAN         | 74.832  | 99 | 24.04 | cDNA FLJ53691, highly similar to Serotransferrin OS=Homo sapiens OX=9606 PE=2 SV=1         |
| tr Q6MZV7 Q6MZV7_HUMAN         | 52.121  | 99 | 23.47 | Uncharacterized protein DKFZp686C11235 OS=Homo sapiens OX=9606 GN=DKFZp686C11235 PE=1 SV=1 |
| sp P01009 A1AT_HUMAN           | 46.737  | 99 | 16.51 | Alpha-1-antitrypsin OS=Homo sapiens OX=9606 GN=SERPINA1 PE=1 SV=3                          |
| sp P01011 AACT_HUMAN           | 47.651  | 99 | 21.75 | Alpha-1-antichymotrypsin OS=Homo sapiens OX=9606 GN=SERPINA3 PE=1 SV=2                     |
| tr S6BGF9 S6BGF9_HUMAN         | 22.743  | 99 | 25.35 | IgG L chain OS=Homo sapiens OX=9606 PE=2 SV=1                                              |
| tr S6BAP8 S6BAP8_HUMAN         | 22.852  | 99 | 24.88 | IgG L chain OS=Homo sapiens OX=9606 PE=2 SV=1                                              |
| tr W8QEY1 W8QEY1_HUMAN         | 78.382  | 99 | 19.13 | Lactoferrin OS=Homo sapiens OX=9606 PE=2 SV=1                                              |
| tr Q96K68 Q96K68_HUMAN         | 53.088  | 99 | 9.51  |                                                                                            |
| tr Q6IPQ0 Q6IPQ0_HUMAN         | 24.824  | 99 | 30.51 | IGL@ protein OS=Homo sapiens OX=9606 GN=IGL@ PE=2 SV=1                                     |
| sp P61626 LYSC_HUMAN           | 16.537  | 99 | 31.08 | Lysozyme C OS=Homo sapiens OX=9606 GN=LYZ PE=1 SV=1                                        |
| tr A7Y9J9 A7Y9J9_HUMAN         | 648.809 | 99 | 1.26  | Mucin 5AC, oligomeric mucus/gel-forming OS=Homo sapiens OX=9606 GN=MUC5AC PE=4 SV=1        |
| tr Q6P5S8 Q6P5S8_HUMAN         | 25.773  | 99 | 25.85 | IGK@ protein OS=Homo sapiens OX=9606 GN=IGK@ PE=1 SV=1                                     |
| tr Q6MZU6 Q6MZU6_HUMAN         | 51.099  | 99 | 7.76  | Uncharacterized protein DKFZp686C15213 OS=Homo sapiens OX=9606 GN=DKFZp686C15213 PE=2 SV=1 |
| sp P02790 HEMO_HUMAN           | 51.676  | 99 | 8.01  | Hemopexin OS=Homo sapiens OX=9606 GN=HPX PE=1 SV=2                                         |
| tr A0A590UJZ9 A0A590UJZ9_HUMAN | 166.577 | 99 | 2.82  | Deleted in malignant brain tumors 1 protein OS=Homo sapiens OX=9606 GN=DMBT1 PE=1 SV=1     |
| sp P01024 CO3_HUMAN            | 187.147 | 99 | 5.17  | Complement C3 OS=Homo sapiens OX=9606 GN=C3 PE=1 SV=2                                      |
| tr Q8WW76 Q8WW76_HUMAN         | 24.695  | 99 | 20.18 | FGA protein OS=Homo sapiens OX=9606 GN=FGA PE=2 SV=1                                       |
| sp P01833 PIGR_HUMAN           | 83.284  | 99 | 4.32  | Polymeric immunoglobulin receptor OS=Homo sapiens OX=9606 GN=PIGR PE=1 SV=4                |
| tr S6AWF0 S6AWF0_HUMAN         | 25.491  | 94 | 6.28  | IgG H chain OS=Homo sapiens OX=9606 PE=2 SV=1                                              |
| sp P98088 MUC5A_HUMAN          | 585.574 | 92 | 1.1   | Mucin-5AC OS=Homo sapiens OX=9606 GN=MUC5AC PE=1 SV=4                                      |
| tr Q6NSB4 Q6NSB4_HUMAN         | 31.382  | 91 | 16.01 | HP protein OS=Homo sapiens OX=9606 GN=HP PE=2 SV=1                                         |
| tr B7Z5Q2 B7Z5Q2_HUMAN         | 108.822 | 91 | 5.6   | cDNA FLJ58075, highly similar to Ceruloplasmin OS=Homo sapiens OX=9606 PE=2 SV=1           |
| tr B4E1D3 B4E1D3_HUMAN         | 54.253  | 90 | 6.96  | cDNA FLJ53952, highly similar to Fibrinogen beta chain OS=Homo sapiens OX=9606 PE=2 SV=1   |
| tr H9KV48 H9KV48_HUMAN         | 50.989  | 90 | 5.18  | Plasma protease C1 inhibitor OS=Homo sapiens OX=9606 GN=SERPING1 PE=1 SV=1                 |
| tr A0A3G5AXY7 A0A3G5AXY7_HUMAN | 8.228   | 83 | 33.78 | Hemoglobin subunit beta (Fragment) OS=Homo sapiens OX=9606 GN=HBB PE=3 SV=1                |

---

|                      |        |    |       |                                                                |
|----------------------|--------|----|-------|----------------------------------------------------------------|
| sp P08246 ELNE_HUMAN | 28.518 | 16 | 17.98 | Neutrophil elastase OS=Homo sapiens OX=9606 GN=ELANE PE=1SV=1; |
|----------------------|--------|----|-------|----------------------------------------------------------------|

---
